# Supplementary material for: Predictors of Positive Video Capsule Endoscopy Findings for Chronic Unexplained Abdominal Pain: Single-Center Retrospective Study and Meta-Analysis
Source: MDPI journal article supplement (doi:10.3390/diagnostics11112123), 2021-11-16
Supplement: s1 [file s1]

**Supplement Table S1. Characteristics of selected studies**

| Study, year      | Design        | country | No of centers | Capsule manufacturer | No of patients with CAP | SEX, male/female | Age, mean(range) | Diagnostic yield, No |
|------------------|---------------|---------|---------------|----------------------|-------------------------|------------------|------------------|----------------------|
| Shim, 2006       | retrospective | korea   | Multiple      | N/A                  | 110                     | 70/40            | 50.8 (N/A)       | 19                   |
| Katsinelos, 2011 | prospective   | greece  | Multiple      | N/A                  | 72                      | N/A              | 45.3 (14-81)     | 30                   |
| Huang, 2018      | retrospective | china   | Multiple      | OMOM                 | 341                     | 47/49            | 44.54 (18-75)    | 96                   |

**Supplement Table S2. Quality of studies by using the QUADAS-2 tool**

| study            | Risk of BIAS      |            |                    |                 | Applicability concerns |            |                    |
|------------------|-------------------|------------|--------------------|-----------------|------------------------|------------|--------------------|
|                  | Patient selection | Index test | Reference standard | Flow and timing | Patient selection      | Index test | Reference standard |
| Shim, 2006       | Low               | Low        | Low                | Low             | Low                    | Low        | Low                |
| Katsinelos, 2011 | Low               | Low        | Low                | Low             | Low                    | Low        | Low                |
| Huang, 2018      | Low               | Low        | Low                | Low             | Low                    | Low        | Low                |

**Supplement Table S3. Summary of results from included studies**

| study                                      | Enrolled patients | Overall diagnostic yield | Relevant variables                                                                                                                               |
|--------------------------------------------|-------------------|--------------------------|--------------------------------------------------------------------------------------------------------------------------------------------------|
| Shim, K.-N. <i>et al.</i> <sup>9</sup>     | 110               | 17.3%                    | weight loss [OR, 18.6 p= 0.02]                                                                                                                   |
| Katsinelos, P. <i>et al.</i> <sup>10</sup> | 72                | 44.4%                    | Elevated ESR [OR, 67.9, p<0.001]<br>Elevated CRP [OR, 41.5, p<0.001]                                                                             |
| Huang, L. <i>et al.</i> <sup>8</sup>       | 341               | 28.15%                   | weight loss [OR, 2.827p=0.038]<br>Hypoalbuminemia [OR, 6.142, p=0.008]<br>Elevated ESR [OR, 4.025, p=0.016]<br>Elevated CRP [OR, 7.539, p=0.002] |
